# Supplementary material for: A rare population of tumor antigen-specific CD4+CD8+ double-positive αβ T lymphocytes uniquely provide CD8-independent TCR genes for engineering therapeutic T cells
Source: PubMed Central journal article supplement (PMC6325755; doi:10.1186/s40425-018-0467-y), 2019-01-09
Supplement: 40425_2018_467_MOESM1_ESM.pdf [file 40425_2018_467_MOESM1_ESM.pdf]

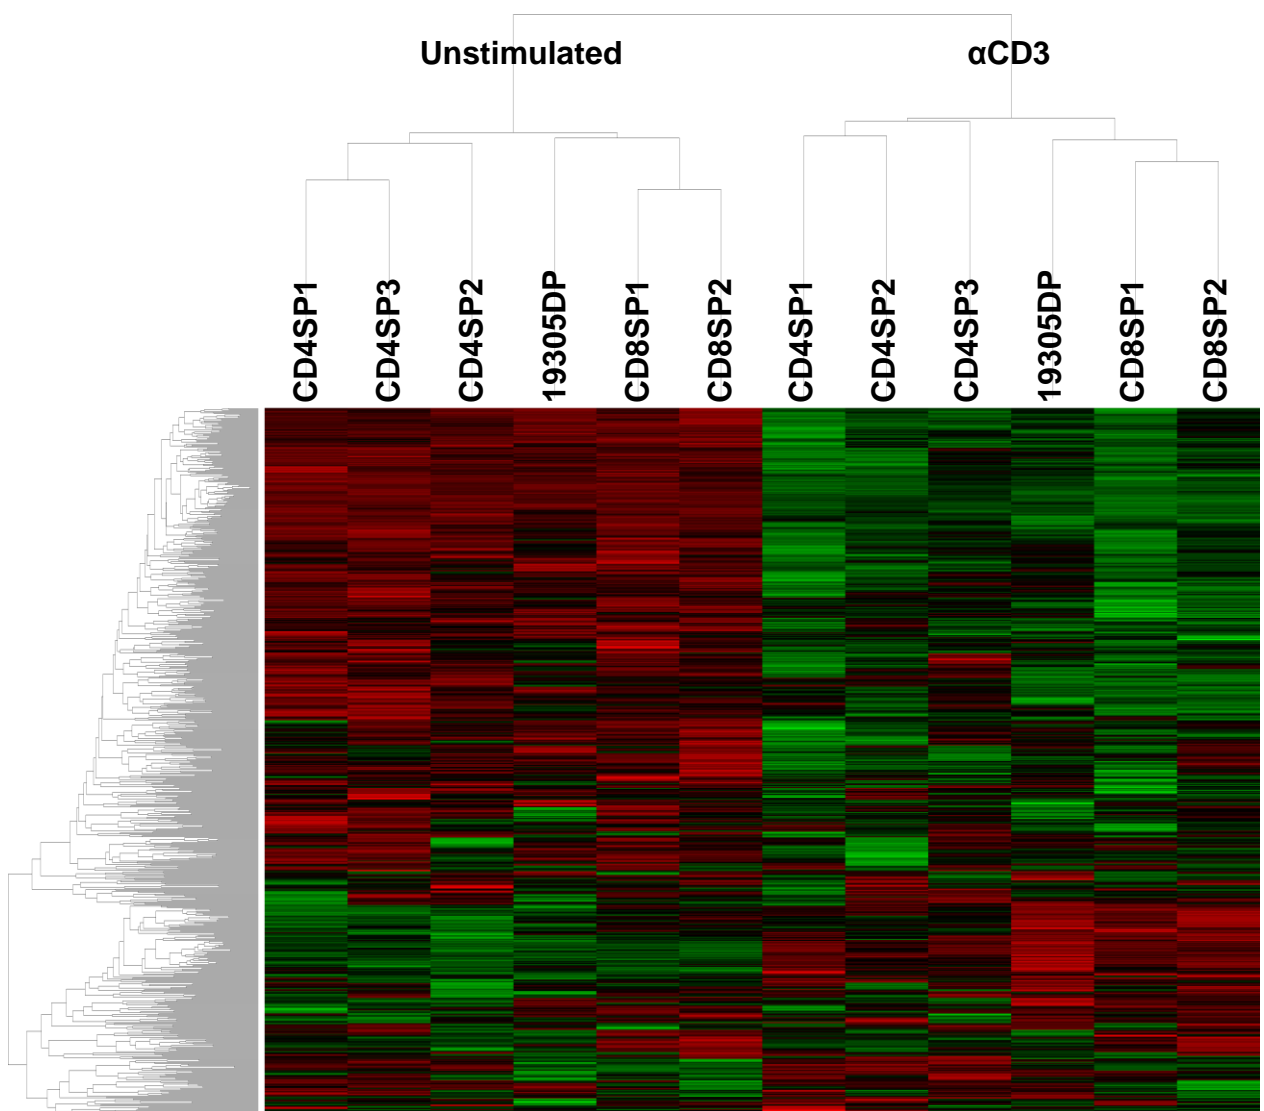

**Additional file 1:** Nanostring analyses of mRNA expression of T-cell clones with or without TCR stimulation. Indicated T-cell clones were stimulated with immobilized anti-CD3 antibody for 2 hours ( $\alpha$ CD3) or unstimulated. Expression level of mRNA was determined using Nanostring system. Clustering analyses of normalized expression data were performed by nSolver Analysis Software.
