# Supplementary material for: A rare population of tumor antigen-specific CD4+CD8+ double-positive αβ T lymphocytes uniquely provide CD8-independent TCR genes for engineering therapeutic T cells
Source: PubMed Central journal article supplement (PMC6325755; doi:10.1186/s40425-018-0467-y), 2019-01-09
Supplement: 40425_2018_467_MOESM4_ESM.pdf [file 40425_2018_467_MOESM4_ESM.pdf]

**A**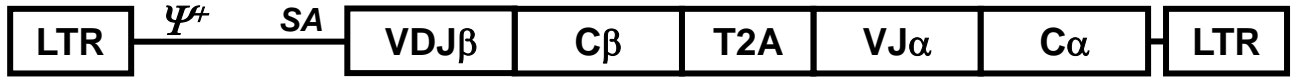**B**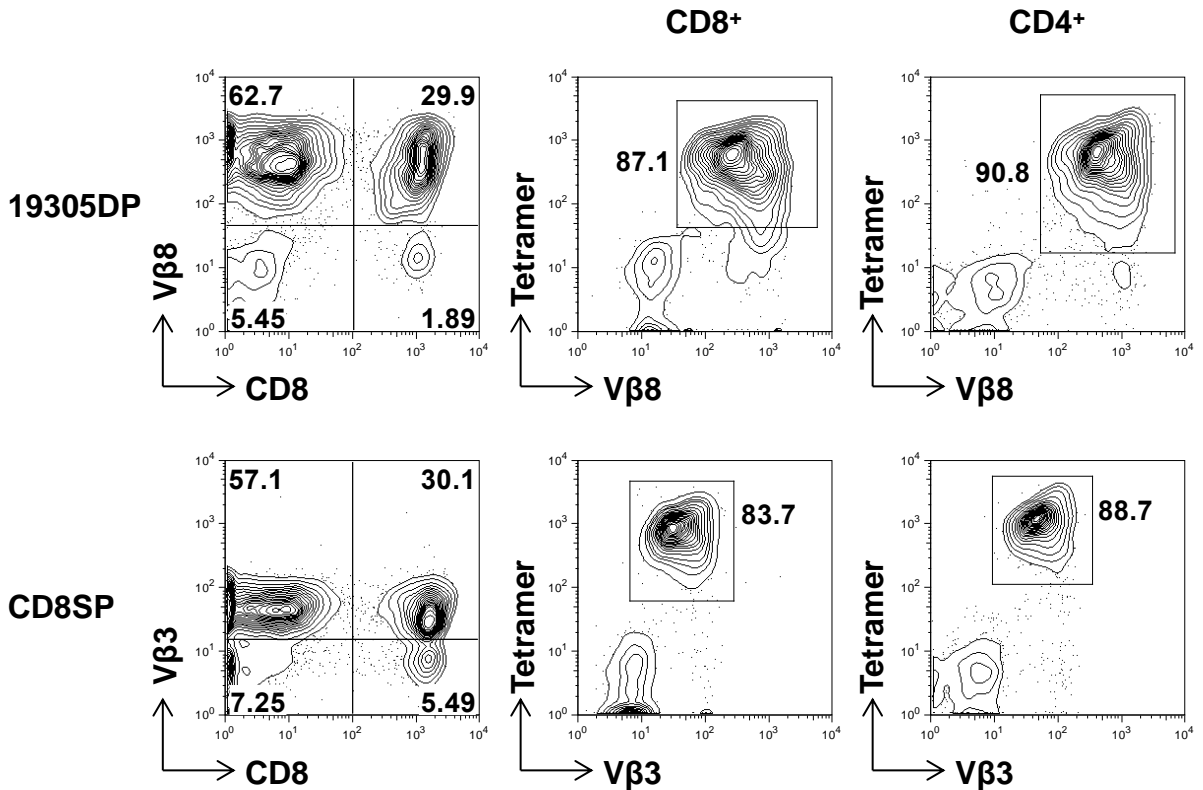

**Additional file 4:** Generation of TCR gene-transduced T cells. (A) Schematic representation of retroviral TCR expression vector for 19305DP- and CD8SP-TCR. LTR: long terminal repeats;  $\psi^+$ : extended packaging signal; SA: Splice acceptor site from the first intron-exon junction of human elongation factor-1 $\alpha$ ; VDJ $\beta$ : TCR  $\beta$  chain variable-diverse-joining regions; C $\beta$ : TCR  $\beta$  chain constant region; T2A: SGSG-linker connected to the T2A translational skipping sequence; VJ $\alpha$ : TCR  $\alpha$  chain variable-joining regions; C $\alpha$ : TCR  $\alpha$  chain constant region. (B) Transduction efficiency of 19305DP-TCR (V $\beta$ 8) and CD8SP-TCR (V $\beta$ 3) gene-engineered T cells was determined by flow cytometry using corresponding anti-V $\beta$  subtype-specific antibodies and A\*02/NY-ESO-1<sub>157-165</sub> tetramer.
