# Supplementary material for: A rare population of tumor antigen-specific CD4+CD8+ double-positive αβ T lymphocytes uniquely provide CD8-independent TCR genes for engineering therapeutic T cells
Source: PubMed Central journal article supplement (PMC6325755; doi:10.1186/s40425-018-0467-y), 2019-01-09
Supplement: 40425_2018_467_MOESM5_ESM.pdf [file 40425_2018_467_MOESM5_ESM.pdf]

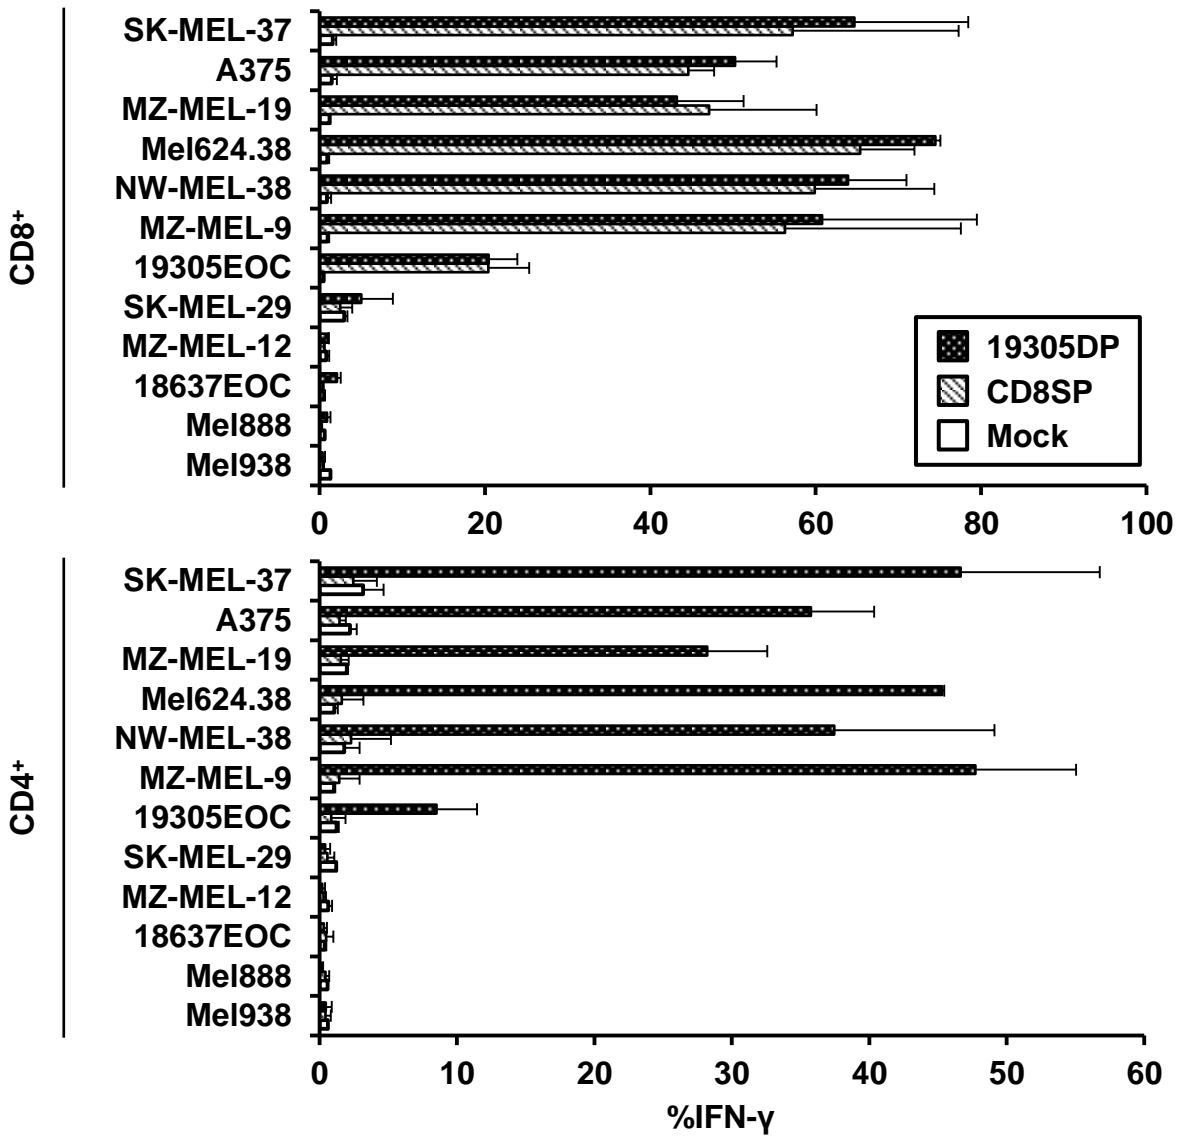

**Additional file 5:** Tumor recognition of TCR gene-transduced T cells against cancer cell lines. Percentages of IFN- $\gamma$  producing cells in CD8<sup>+</sup> and CD4<sup>+</sup> T cells against a panel of melanoma and ovarian cancer cell lines were determined by intracellular cytokine staining. Pooled data from two independent experiments were shown.
