# Supplementary material for: A rare population of tumor antigen-specific CD4+CD8+ double-positive αβ T lymphocytes uniquely provide CD8-independent TCR genes for engineering therapeutic T cells
Source: PubMed Central journal article supplement (PMC6325755; doi:10.1186/s40425-018-0467-y), 2019-01-09
Supplement: 40425_2018_467_MOESM6_ESM.pdf [file 40425_2018_467_MOESM6_ESM.pdf]

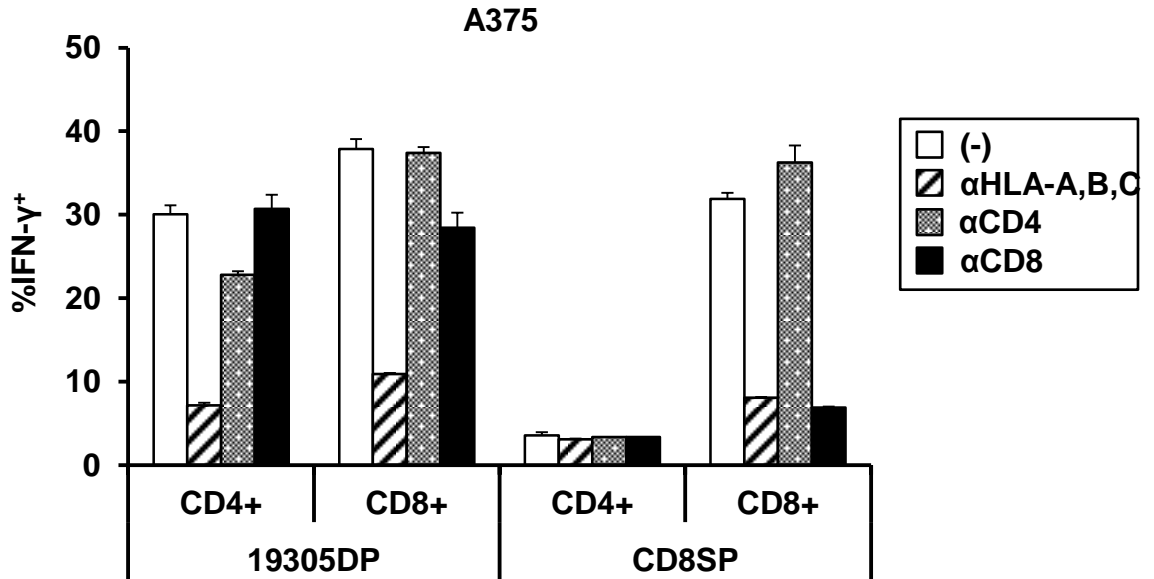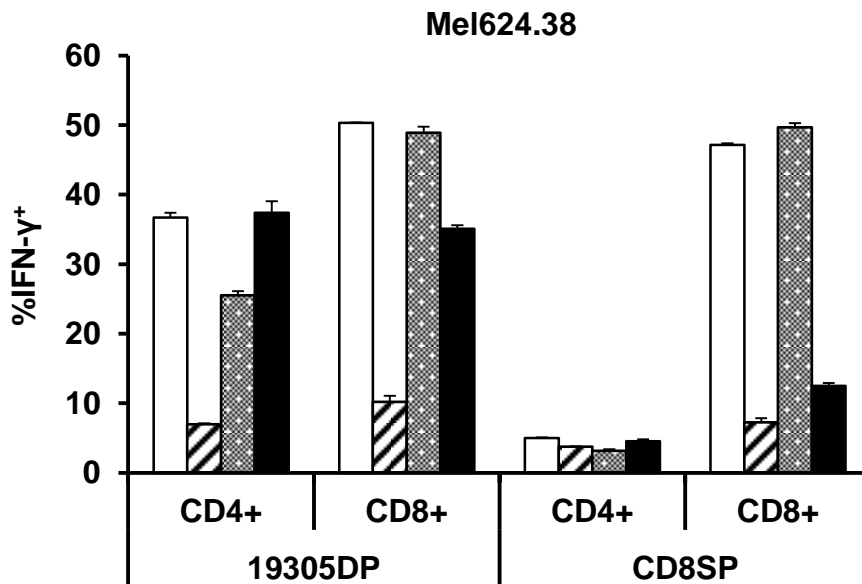

**Additional file 6:** Effect of co-ligation signals on recognition of cancer cells by TCR-transduced T cells. Reactivity of 19305DP-TCR or CD8SP-TCR-transduced T cells against A375 or Mel624.38 was tested by intracellular cytokine staining. Before coculture, cancer cells or T cells were incubated with or without (-) anti-MHC class I ( $\alpha$ HLA-A,B,C), anti-CD4 ( $\alpha$ CD4) or anti-CD8 ( $\alpha$ CD8) antibody for 30 minutes and then T cells or cancer cells were added without washing out the antibodies. Percentages of IFN- $\gamma$  producing CD4<sup>+</sup> or CD8<sup>+</sup> T cells were plotted from two independent experiments.
