# Supplementary material for: A rare population of tumor antigen-specific CD4+CD8+ double-positive αβ T lymphocytes uniquely provide CD8-independent TCR genes for engineering therapeutic T cells
Source: PubMed Central journal article supplement (PMC6325755; doi:10.1186/s40425-018-0467-y), 2019-01-09
Supplement: 40425_2018_467_MOESM7_ESM.pdf [file 40425_2018_467_MOESM7_ESM.pdf]

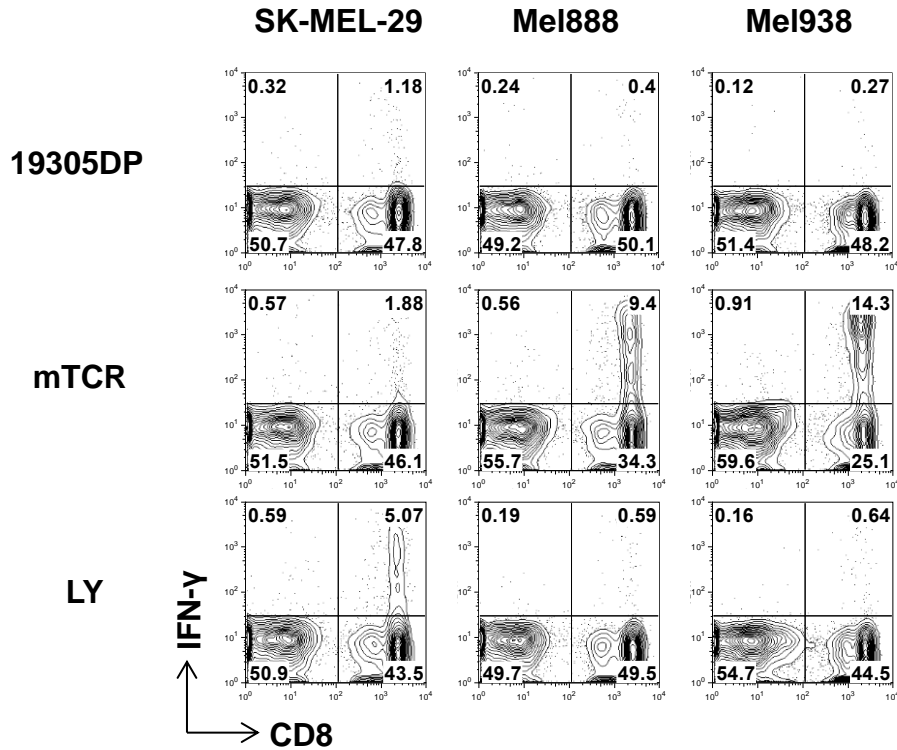

**Additional file 7:** Comparison of off-target reactivity of 19305DP-TCR and other high-affinity TCRs. Recognition of NY-ESO-1<sup>-</sup> or HLA-A2<sup>-</sup> melanoma cell lines (SK-MEL-29: A\*02+NY-ESO-1<sup>-</sup>; Mel888: A\*02-NY-ESO-1<sup>-</sup>; Mel938: A\*02-NY-ESO-1<sup>+</sup>) by 19305DP-TCR-transduced T cells was compared to T cells transduced with affinity-enhanced TCR (LY) or murine TCR (mTCR) by intracellular cytokine staining.
