# Supplementary material for: A rare population of tumor antigen-specific CD4+CD8+ double-positive αβ T lymphocytes uniquely provide CD8-independent TCR genes for engineering therapeutic T cells
Source: PubMed Central journal article supplement (PMC6325755; doi:10.1186/s40425-018-0467-y), 2019-01-09
Supplement: 40425_2018_467_MOESM8_ESM.pdf [file 40425_2018_467_MOESM8_ESM.pdf]

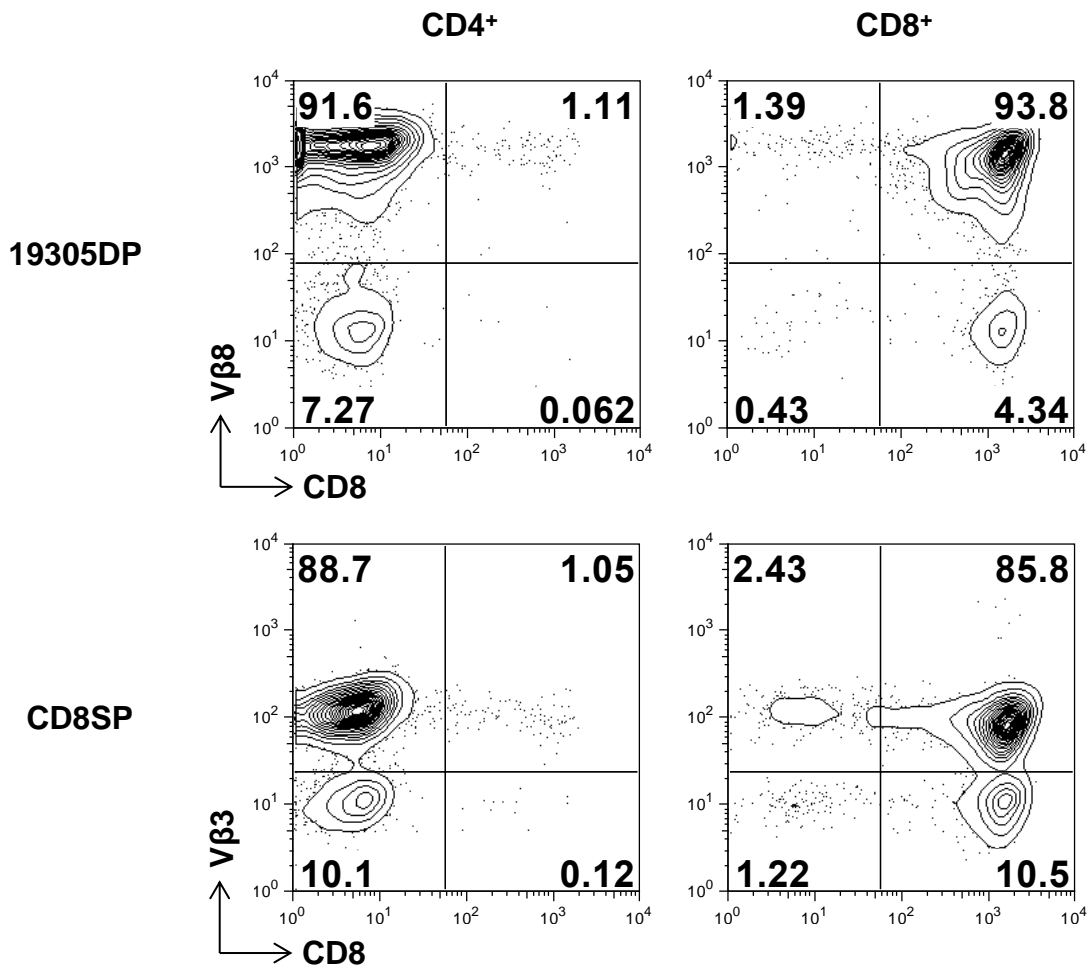

**Additional file 8:** Transduction efficiency of TCR in isolated CD4<sup>+</sup> and CD8<sup>+</sup> T cells. CD8<sup>+</sup> T cells or CD4<sup>+</sup> T cells were depleted from normal donor PBMC and infected with retroviral vector for 19305DP-TCR (Vβ8) or CD8SP-TCR (Vβ3). Transduction efficiency and CD4/CD8 purity was investigated by flow cytometry using corresponding Vβ-subtype-specific antibodies and anti-CD8 antibody.
