# Supplementary material for: A rare population of tumor antigen-specific CD4+CD8+ double-positive αβ T lymphocytes uniquely provide CD8-independent TCR genes for engineering therapeutic T cells
Source: PubMed Central journal article supplement (PMC6325755; doi:10.1186/s40425-018-0467-y), 2019-01-09
Supplement: 40425_2018_467_MOESM10_ESM.pdf [file 40425_2018_467_MOESM10_ESM.pdf]

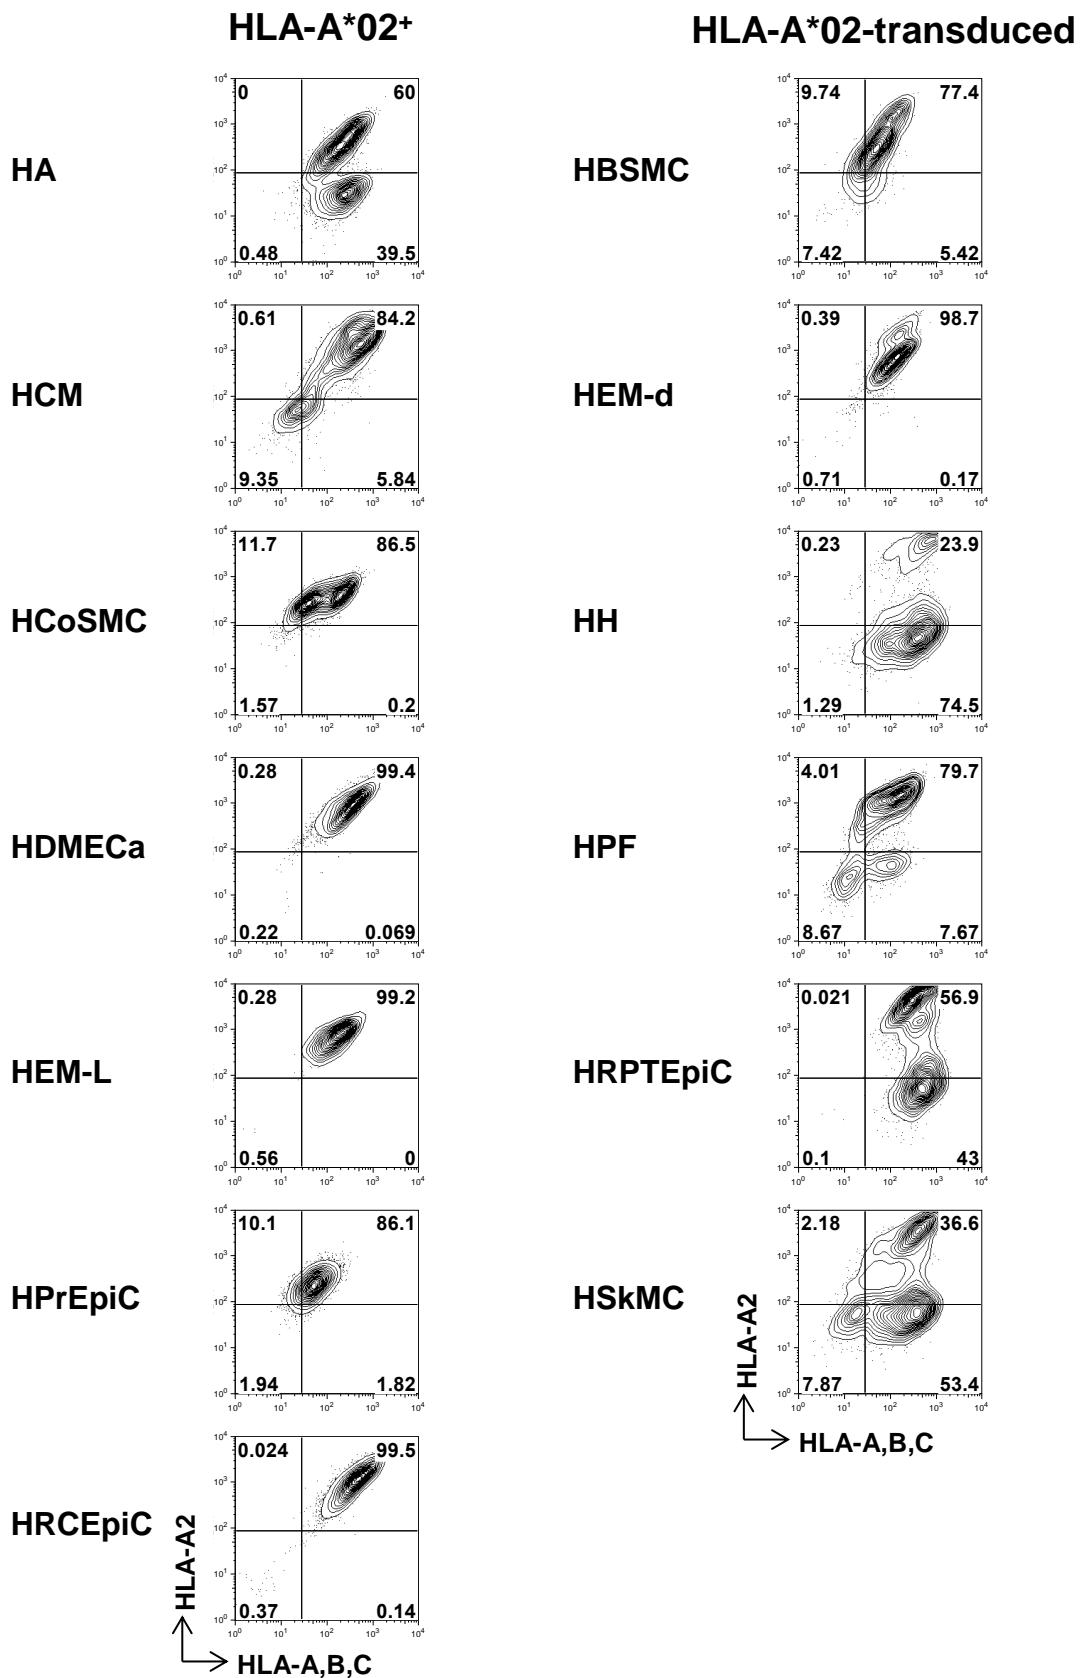

**Additional file 10:** Expression of HLA-A2 and HLA class I on A\*02+ or A\*02-transduced normal cell lines. Surface HLA-A2 and HLA class I (HLA-A,B,C, clone: W6/32) expression was analyzed by flow cytometry.
